# Supplementary material for: EMBuilder: A Template Matching-based Automatic Model-building Program for High-resolution Cryo-Electron Microscopy Maps
Source: PubMed Central journal article supplement (PMC5453991; doi:10.1038/s41598-017-02725-w), 2017-06-01
Supplement: 41598_2017_2725_MOESM1_ESM.pdf [file 41598_2017_2725_MOESM1_ESM.pdf]

**EMBuilder: A Template Matching-based Automatic Model-building Program for  
High-resolution Cryo-Electron Microscopy Maps**

Niyun Zhou, Hongwei Wang, and Jiawei Wang

**Supplementary Table S1. Accuracy of the side chain assignment of EMBuilder on the test data sets.**

| EMDB entry of test data sets | Resolution (Å) | Successful assigned residues | Total assigned residues | Sidechain assignment accuracy |
|------------------------------|----------------|------------------------------|-------------------------|-------------------------------|
| 8117                         | 2.95           | 776                          | 968                     | 80.17%                        |
| 6630                         | 3.26           | 1962                         | 2339                    | 83.88%                        |
| 3297                         | 3.3            | 1029                         | 2643                    | 38.93%                        |
| 3061                         | 3.4            | 323                          | 457                     | 70.68%                        |
| 3388                         | 3.4            | 594                          | 1804                    | 32.93%                        |
| 6534                         | 3.7            | 34                           | 409                     | 8.31%                         |

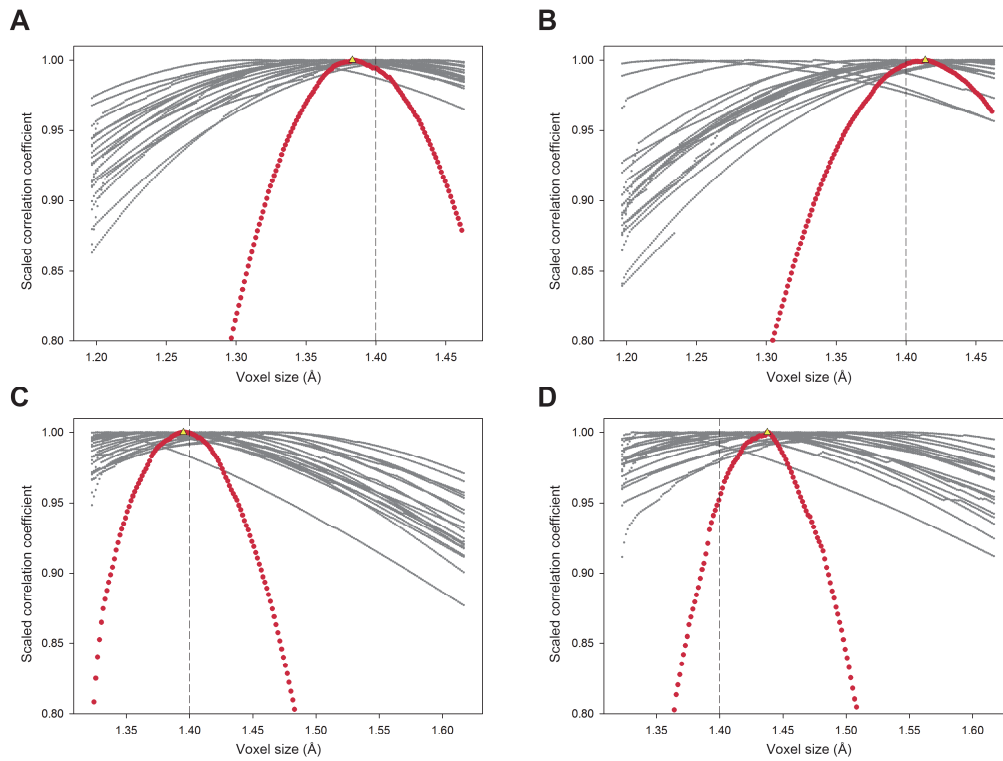

**Supplementary Figure S1. Voxel size refinement on the cryoEM map of  $\gamma$ -secretase (EMDB entry 3061).** The initial voxel size is set to -5% (panel A, B) and +5% (panel C, D), respectively. The helix template (panel A, C) and strand template (panel B, D) are used for the refinement. Each grey line represents the scaled CCs of a single helix or strand template. The red line represents the scaled sum of all CCs (grey lines) and the yellow triangle represents the maximum value of red line (refined voxel size of helices or strands). The dashed vertical line represents the deposited voxel size of the map.
